# Supplementary material for: photographer spotlight: jen altman
Source: MDPI journal article supplement (doi:10.3390/molecules27175614), 2008-01-01
Supplement: s1 [file s1]

*Article title:* Development, validation, and use of <sup>1</sup>H-NMR spectroscopy for evaluating the quality of acerola-based food supplements and quantifying ascorbic acid

*Authors:* Asma Bourafai-Aziez, Daniel Jacob, Gwladys Charpentier, Emmanuel Cassin, Guillaume Rousselot, Annick Moing and Catherine Deborde

**Table S1.** Calculated (AA area/Choline area) ratio for <sup>1</sup>H-NMR spectra of 117 samples of acerola concentrate juice

| Sample code                 | AA area<br>B4_8905 | Choline area<br>B3_2595 | Ratio (AA area/<br>Choline area) |
|-----------------------------|--------------------|-------------------------|----------------------------------|
| Acerola EC 2021139LC01-E1_2 | 117.96             | 52.96                   | 2.228                            |
| Acerola EC 2021139LC01-E2_2 | 96.96              | 43.66                   | 2.221                            |
| Acerola EC 2021139LC02-E1_2 | 111.55             | 51.70                   | 2.158                            |
| Acerola EC 2021139LC02-E2_2 | 128.62             | 59.60                   | 2.158                            |
| Acerola EC 2021174LC01-E1_2 | 114.65             | 56.95                   | 2.013                            |
| Acerola EC 2021174LC01-E2_2 | 137.49             | 68.60                   | 2.004                            |
| Acerola EC 2021189LC01-E1_2 | 126.72             | 64.59                   | 1.962                            |
| Acerola EC 2021189LC01-E2_2 | 126.71             | 64.21                   | 1.973                            |
| Acerola EC 2021202LC01-E1_2 | 136.79             | 66.63                   | 2.053                            |
| Acerola EC 2021202LC01-E2_2 | 142.14             | 69.60                   | 2.042                            |
| Acerola EC 20190-1 E1_2     | 119.69             | 60.52                   | 1.978                            |
| Acerola EC 20190-1 E2_2     | 117.15             | 58.75                   | 1.994                            |
| Acerola EC 20197-1 E1_2     | 138.29             | 72.33                   | 1.912                            |
| Acerola EC 20197-1 E2_2     | 92.91              | 48.44                   | 1.918                            |
| Acerola EC 20197-2 E1_2     | 96.37              | 46.60                   | 2.068                            |
| Acerola EC 20197-2 E2_2     | 111.99             | 53.60                   | 2.089                            |
| Acerola EC 2021006LC01-E1_2 | 94.14              | 48.41                   | 1.945                            |
| Acerola EC 2021006LC01-E2_2 | 102.61             | 52.69                   | 1.947                            |
| Acerola EC 2021006LC02-E1_2 | 87.86              | 44.60                   | 1.970                            |
| Acerola EC 2021006LC02-E2_2 | 106.21             | 53.64                   | 1.980                            |
| Acerola EC 2021013LC01-E1_2 | 96.86              | 54.86                   | 1.765                            |
| Acerola EC 2021013LC01-E2_2 | 108.22             | 61.02                   | 1.773                            |
| Acerola EC 2021013LC02-E1_2 | 103.23             | 57.76                   | 1.787                            |
| Acerola EC 2021013LC02-E2_2 | 111.15             | 62.11                   | 1.789                            |
| Acerola EC 2021042LC03-E1_2 | 86.61              | 55.47                   | 1.561                            |
| Acerola EC 2021042LC03-E2_2 | 117.39             | 75.28                   | 1.559                            |
| Acerola EC 2021056LC01-E1_2 | 107.97             | 44.93                   | 2.403                            |
| Acerola EC 2021056LC01-E2_2 | 106.04             | 44.20                   | 2.399                            |

|                                 |        |       |       |
|---------------------------------|--------|-------|-------|
| Acerola EC 2021069LC01-E1_2     | 92.50  | 42.37 | 2.183 |
| Acerola EC 2021069LC01-E2_2     | 115.93 | 53.12 | 2.182 |
| Acerola EC 2021070LC01-E1_2     | 102.51 | 56.02 | 1.830 |
| Acerola EC 2021070LC01-E2_2     | 128.48 | 70.29 | 1.828 |
| Acerola EC 2021076LC02-E1_2     | 95.93  | 43.46 | 2.207 |
| Acerola EC 2021076LC02-E2_2     | 119.06 | 53.60 | 2.221 |
| Acerola EC 2021077LC02-E1_2     | 86.81  | 39.62 | 2.191 |
| Acerola EC 2021077LC02-E2_2     | 110.72 | 50.74 | 2.182 |
| Acerola EC 2021096LC03-E1_2     | 91.26  | 46.59 | 1.959 |
| Acerola EC 2021096LC03-E2_2     | 87.59  | 44.49 | 1.969 |
| Acerola EC 2021132LC01-E1_2     | 159.56 | 81.76 | 1.952 |
| Acerola EC 2021132LC01-E2_2     | 127.81 | 65.28 | 1.958 |
| Acerola EC 2021223LC01-E1_2     | 145.11 | 86.41 | 1.679 |
| Acerola EC 2021223LC01-E2_2     | 116.56 | 68.57 | 1.700 |
| Acerola EC 2021274LC02-E1_2     | 117.31 | 69.10 | 1.698 |
| Acerola EC 2021274LC02-E2_2     | 121.46 | 71.69 | 1.694 |
| Acerola EC 2021288LC01-E1_2     | 106.02 | 62.38 | 1.700 |
| Acerola EC 2021288LC01-E2_2     | 106.71 | 63.49 | 1.681 |
| Acerola EC 2021302LC01-E1_2     | 128.33 | 71.24 | 1.801 |
| Acerola EC 2021302LC01-E2_2     | 116.17 | 64.15 | 1.811 |
| Acerola EC 2021309LC01-E1_2     | 125.04 | 65.70 | 1.903 |
| Acerola EC 2021309LC01-E2_2     | 138.24 | 72.08 | 1.918 |
| Acerola EC 2021323LC01-E1_2     | 146.81 | 80.24 | 1.830 |
| Acerola EC 2021323LC01-E2_2     | 123.68 | 68.01 | 1.818 |
| Acerola EC 2021323LC02-bis-E1_2 | 143.16 | 77.47 | 1.848 |
| Acerola EC 2021323LC02-bis-E2_2 | 152.26 | 82.45 | 1.847 |
| Acerola EC 2021363LC01-E1_2     | 106.71 | 47.51 | 2.246 |
| Acerola EC 2021363LC01-E2_2     | 116.17 | 52.91 | 2.196 |
| Acerola EC 2021363LC02-E1_2     | 97.76  | 44.17 | 2.213 |
| Acerola EC 2021363LC02-E2_2     | 130.41 | 59.18 | 2.203 |
| Acerola EC 2022040LC03-E1_2     | 110.94 | 47.67 | 2.327 |
| Acerola EC 2022040LC03-E2_2     | 129.82 | 55.76 | 2.328 |
| Acerola EC 2022040LC04-E1_2     | 102.21 | 43.75 | 2.336 |
| Acerola EC 2022040LC04-E2_2     | 107.64 | 45.99 | 2.341 |
| Acerola EC 2022041LC01-E1_2     | 112.39 | 43.83 | 2.564 |

|                             |        |       |       |
|-----------------------------|--------|-------|-------|
| Acerola EC 2022041LC01-E2_2 | 96.47  | 37.51 | 2.572 |
| Acerola EC 2022041LC02-E1_2 | 101.10 | 37.24 | 2.715 |
| Acerola EC 2022041LC02-E2_2 | 156.56 | 58.14 | 2.693 |
| Acerola EC 2022091LC02-E1_2 | 125.32 | 55.45 | 2.260 |
| Acerola EC 2022091LC02-E2_2 | 116.21 | 51.31 | 2.265 |
| Acerola EC 2022101LC01-E1_2 | 112.76 | 53.09 | 2.124 |
| Acerola EC 2022101LC01-E2_2 | 141.67 | 66.73 | 2.123 |
| Acerola EC 2022103LC01-E1_2 | 132.07 | 51.95 | 2.542 |
| Acerola EC 2022103LC01-E2_2 | 143.58 | 56.74 | 2.531 |
| Acerola EC 2022103LC02-E1_2 | 136.13 | 54.26 | 2.509 |
| Acerola EC 20303-1 E1_2     | 117.65 | 72.66 | 1.619 |
| Acerola EC 20303-1 E2_2     | 121.81 | 75.28 | 1.618 |
| Acerola EC 20303-2 E1_2     | 101.32 | 62.72 | 1.615 |
| Acerola EC 20303-2 E2_2     | 104.45 | 65.09 | 1.605 |
| Acerola EC 20315-1-E1_2     | 146.95 | 86.61 | 1.697 |
| Acerola EC 20315-1-E2_2     | 131.09 | 78.35 | 1.673 |
| Acerola EC 20316-1-E1_2     | 113.92 | 64.70 | 1.761 |
| Acerola EC 20364-1-E1_2     | 106.63 | 55.90 | 1.908 |
| Acerola EC 20364-1-E2_2     | 113.11 | 58.84 | 1.922 |
| Acerola EC 20364-2-E1_2     | 94.18  | 48.77 | 1.931 |
| Acerola EC 20364-2-E2_2     | 114.37 | 59.24 | 1.931 |
| Acerola EC B0296600-E1_2    | 103.82 | 53.25 | 1.950 |
| Acerola EC B0296600-E2_2    | 126.36 | 64.84 | 1.949 |
| Acerola EC B1186687-E1_2    | 103.64 | 46.35 | 2.236 |
| Acerola EC B1186687-E2_2    | 120.47 | 53.79 | 2.240 |
| Acerola EC F0296602-E1_2    | 128.59 | 57.19 | 2.248 |
| Acerola EC F0296602-E2_2    | 135.06 | 60.29 | 2.240 |
| Acerola EC H0296602-E1_2    | 103.97 | 45.45 | 2.287 |
| Acerola EC H0296602-E2_2    | 113.13 | 49.25 | 2.297 |
| Acerola EC J0296604-E1_2    | 123.37 | 50.94 | 2.422 |
| Acerola EC J0296604-E2_2    | 100.18 | 41.55 | 2.411 |
| Acerola EC K0296605-E1_2    | 100.29 | 49.43 | 2.029 |
| Acerola EC K0296605-E2_2    | 109.36 | 53.67 | 2.038 |
| Acerola EC L0296606-E1_2    | 112.60 | 58.23 | 1.934 |
| Acerola EC L0296606-E2_2    | 105.38 | 54.36 | 1.939 |

|                            |        |       |        |
|----------------------------|--------|-------|--------|
| Acerola EC L20310-1-E1_2   | 108.52 | 67.10 | 1.617  |
| Acerola EC L20310-1-E2_2   | 104.85 | 63.79 | 1.644  |
| Acerola EC L20315-2-E1_2   | 92.18  | 63.10 | 1.461  |
| Acerola EC L20315-2-E2_2   | 111.62 | 76.19 | 1.465  |
| Acerola EC L20316-1-E2_2   | 109.41 | 62.50 | 1.751  |
| Acerola EC L20331-1-E1_2   | 126.44 | 67.36 | 1.877  |
| Acerola EC L20331-1-E2_2   | 119.95 | 63.20 | 1.898  |
| Acerola EC N0296607-E1_2   | 112.20 | 56.65 | 1.981  |
| Acerola EC N0296607-E2_2   | 120.74 | 60.81 | 1.986  |
| Acerola EC X0296699-E1_2   | 110.62 | 58.62 | 1.887  |
| Acerola EC X0296699-E2_2   | 120.10 | 63.30 | 1.897  |
| Acerola EC Z1156679-E1_2   | 103.66 | 49.18 | 2.108  |
| Acerola EC Z1156679-E2_2   | 104.27 | 49.37 | 2.112  |
| Acerola EC2021019LC01-E1_2 | 83.35  | 51.78 | 1.610  |
| Acerola EC2021019LC01-E2_2 | 113.57 | 70.58 | 1.609  |
| Acerola EC2021019LC02-E1_2 | 91.02  | 52.76 | 1.725  |
| Acerola EC2021019LC02-E2_2 | 95.33  | 55.18 | 1.728  |
| Acerola EC2021042LC02-E1_2 | 98.48  | 60.78 | 1.620  |
| Acerola EC2021042LC02-E2_2 | 102.59 | 62.89 | 1.631  |
| Mean                       |        |       | 1.995  |
| SD                         |        |       | 0.275  |
| RSD (%)                    |        |       | 13.80% |

B4\_8905: bucket centered at 4.89 ppm containing the doublet of ascorbic acid H1; B3\_2595: bucket centered at 3.26 ppm containing the singlet of choline (CH<sub>3</sub>)<sub>3</sub>; NMR area in arbitrary unit.

**Table S 2.** Ingredients listed on product manufacturer labels

| Food supplements (D.S.)  | Composition                                                                                                                  | Galenic form |
|--------------------------|------------------------------------------------------------------------------------------------------------------------------|--------------|
| Acerola reference powder | Organic acerola extract powder<br>titrated to 17% of Vitamin C                                                               | Powder       |
| D.S.1                    | Organic acerola extract powder<br>titrated to 17% Vitamin C                                                                  | Powder       |
| D.S.2                    | Acerola extract powder titrated to<br>15.44% of Vitamin C<br>Royal jelly<br><i>Citrus paradisi</i> fruit and seed<br>extract | Tablet       |
| D.S.3                    | Acerola extract powder titrated to<br>16.99% Vitamin C<br>Maltodextrin                                                       | Tablet       |

|       |                                                                                                                                                                                                        |         |
|-------|--------------------------------------------------------------------------------------------------------------------------------------------------------------------------------------------------------|---------|
|       | Cane Sugar<br>Dried rice syrup<br>Dextrose<br>Gum acacia<br>Anti-caking agents: magnesium carbonate. Talc<br>Natural flavor: berries<br>Sunflower oil                                                  |         |
| D.S.4 | Sucrose<br>Vitamin C<br>Dextrose<br>Anti-caking agents: calcium stearate. silicon dioxide<br>Acidifying agent: citric acid<br>Flavor<br>Acerola extract<br>Cynorrhodon extract<br>Sweet orange extract | Tablet  |
| D.S.5 | Sorbitol<br>Acerola extract powder titrated to 25% Vitamin C<br>Xylitol<br>Natural flavor: berries<br>Anti-caking agents: magnesium Stearate<br>Stevia                                                 | Tablet  |
| D.S.6 | Acerola extract powder titrated to 25% Vitamin C<br>Sorbitol<br>Xylitol<br>Cane Sugar<br>Anti-caking agents: magnesium stearate<br>Cherry flavor<br><i>Citrus sinensis</i> bioflavonoids               | Tablet  |
| D.S.7 | Acerola extract powder titrated to 17% Vitamin C<br>Vegetal cover                                                                                                                                      | Capsule |
| D.S.8 | Acerola extract powder with added Vitamin C titrated to 17% Vitamin C<br>Blackcurrant powder<br>Cranberry powder<br>Anti-caking agents: calcium salts of fatty acids<br>Sodium saccharin               | Tablet  |
| D.S.9 | Acerola extract powder<br>Sorbitol<br>Sucralose<br>Acesulfame potassium                                                                                                                                | Tablet  |

|        |                                                     |        |
|--------|-----------------------------------------------------|--------|
| D.S.10 | Anti-caking agents: calcium salts<br>of fatty acids | Tablet |
|        | Naturel red fruit flavor                            |        |
|        | Anti-caking agents: calcium salts<br>of fatty acids |        |
|        | Sorbitol                                            |        |
|        | Acerola extract powder                              |        |
|        | Anti-caking agents: calcium<br>stearate             |        |
|        | Vitamin C                                           |        |
|        | Cherry flavor                                       |        |

**Table S3.** Calculated (AA area/Choline area) ratio for <sup>1</sup>H-NMR spectra of 50 samples prepared from acerola powder

| Sample code                 | Choline area<br>B3_2490 | AA area<br>B4_8730 | Ratio (AA area/<br>Choline area) |
|-----------------------------|-------------------------|--------------------|----------------------------------|
| acerola bio b1388901 c11_2  | 20.14                   | 52.31              | 2.597                            |
| acerola bio c2118201 c11_2  | 23.19                   | 46.32              | 1.997                            |
| acerola bio f1465301 c21_2  | 21.69                   | 45.10              | 2.080                            |
| acerola bio f1465301 c31_2  | 23.61                   | 48.89              | 2.071                            |
| acerola bio f1465301 c41_2  | 22.00                   | 45.65              | 2.075                            |
| acerola bio f2118101 c41_2  | 20.54                   | 48.76              | 2.374                            |
| acerola bio f2118202 c11_2  | 23.26                   | 42.82              | 1.841                            |
| acerola bio h2096801 c21_2  | 21.98                   | 47.93              | 2.180                            |
| acerola bio k1377601 c241_2 | 20.70                   | 46.50              | 2.247                            |
| acerola bio k2011701 c101_2 | 23.72                   | 42.52              | 1.793                            |
| acerola bio k2011701 c21_2  | 23.82                   | 42.75              | 1.794                            |
| acerola bio k2011701 c61_2  | 23.20                   | 41.59              | 1.793                            |
| acerola bio k2263301 c11_2  | 20.26                   | 44.79              | 2.211                            |
| acerola bio l1388601 c41_2  | 20.77                   | 45.15              | 2.174                            |
| acerola bio l1388601 c71_2  | 20.40                   | 43.49              | 2.132                            |
| acerola bio n1185401 c51_2  | 19.19                   | 43.04              | 2.242                            |
| acerola bio n1185401 c81_2  | 18.32                   | 41.46              | 2.263                            |
| acerola bio n2253001 c21_2  | 20.43                   | 51.92              | 2.542                            |
| acerola bio n2253001 c61_2  | 19.59                   | 50.13              | 2.559                            |
| acerola Bio R0294501-C21_2  | 19.09                   | 39.78              | 2.083                            |
| acerola Bio R0294501-C41_2  | 19.36                   | 28.88              | 1.491                            |
| Acerola Bio R0294501-C61_2  | 19.63                   | 28.01              | 1.427                            |
| acerola bio r2252901 c111_2 | 20.14                   | 46.56              | 2.312                            |
| acerola bio r2252901 c151_2 | 20.31                   | 46.37              | 2.283                            |
| acerola bio r2252901 c71_2  | 19.68                   | 45.27              | 2.300                            |
| acerola bio t1185201 c111_2 | 18.59                   | 44.78              | 2.408                            |
| acerola bio t1185201 c131_2 | 18.34                   | 44.18              | 2.409                            |

|                             |       |       |        |
|-----------------------------|-------|-------|--------|
| acerola bio t2142301 c41_2  | 19.27 | 47.29 | 2.454  |
| acerola bio t2142301 c61_2  | 19.10 | 47.06 | 2.464  |
| acerola bio t2142301 c81_2  | 18.70 | 45.86 | 2.452  |
| acerola bio u1399301 c1_2   | 20.57 | 45.87 | 2.230  |
| acerola bio u1399301 c11_2  | 20.43 | 46.18 | 2.260  |
| acerola bio u1399301 c31_2  | 20.26 | 45.95 | 2.268  |
| acerola bio u2020701 c101_2 | 23.17 | 41.99 | 1.812  |
| acerola bio u2020701 c141_2 | 23.21 | 42.69 | 1.840  |
| acerola bio u2020701 c21_2  | 23.25 | 42.22 | 1.816  |
| acerola bio u2020701 c61_2  | 22.87 | 41.42 | 1.811  |
| acerola bio w0262001 c101_2 | 18.07 | 41.54 | 2.299  |
| acerola bio w0262001 c11_2  | 17.83 | 40.87 | 2.292  |
| acerola bio w0262001 c41_2  | 17.88 | 40.13 | 2.244  |
| acerola bio w0262001 c81_2  | 18.19 | 41.30 | 2.270  |
| acerola bio w0262001-c121_2 | 18.31 | 41.64 | 2.274  |
| acerola bio w0262001-c141_2 | 18.43 | 41.92 | 2.275  |
| acerola bio w0262001-c161_2 | 17.73 | 40.03 | 2.258  |
| acerola bio w0262001-c181_2 | 18.29 | 40.44 | 2.211  |
| acerola bio w0262001-c211_2 | 18.35 | 40.75 | 2.221  |
| acerola bio w0262001-c51_2  | 17.72 | 40.19 | 2.268  |
| acerola bio x1422201 c111_2 | 21.19 | 44.67 | 2.108  |
| acerola bio x1422201 c131_2 | 22.00 | 46.19 | 2.099  |
| acerola bio x1422201 c231_2 | 21.97 | 45.89 | 2.089  |
| Mean                        |       |       | 2.159  |
| SD                          |       |       | 0.254  |
| RSD (%)                     |       |       | 11.77% |

B3\_2490: bucket centered at 3.25 ppm containing the singlet of choline (CH<sub>3</sub>)<sub>3</sub>; B4\_8730: bucket centered at 4.87 ppm containing the doublet of ascorbic acid H1; NMR area in arbitrary unit

**Table S4.** Repeatability of the qNMR method based on <sup>1</sup>H-NMR

| Experiments                  | AA area<br>B4_8695 | TSP area<br>B0_0170 |
|------------------------------|--------------------|---------------------|
| Ascorbic Acid (Batch 1966)-1 | 133.26             | 25.34               |
| Ascorbic Acid (Batch 1966)-2 | 132.63             | 25.13               |
| Ascorbic Acid (Batch 1966)-3 | 132.08             | 25.19               |
| Ascorbic Acid (Batch 1966)-4 | 131.44             | 24.99               |
| Ascorbic Acid (Batch 1966)-5 | 132.48             | 25.01               |
| Ascorbic Acid (Batch 1966)-6 | 131.38             | 24.94               |
| Ascorbic Acid (Batch 1966)-7 | 132.43             | 25.03               |
| Ascorbic Acid (Batch 1966)-8 | 131.79             | 24.76               |

|                               |        |       |
|-------------------------------|--------|-------|
| Ascorbic Acid (Batch 1966)-9  | 132.32 | 25.05 |
| Ascorbic Acid (Batch 1966)-10 | 131.15 | 24.85 |
| <b>Mean (n=10)</b>            | 132.09 | 25.03 |
| <b>SD</b>                     | 0.656  | 0.166 |
| <b>RSD (%)</b>                | 0.50%  | 0.66% |

B4\_8695: bucket centered at 4.87 ppm containing the doublet of ascorbic acid H1; B-0\_0170: bucket centered at 0 ppm containing the singlet of TSP; NMR area in arbitrary unit



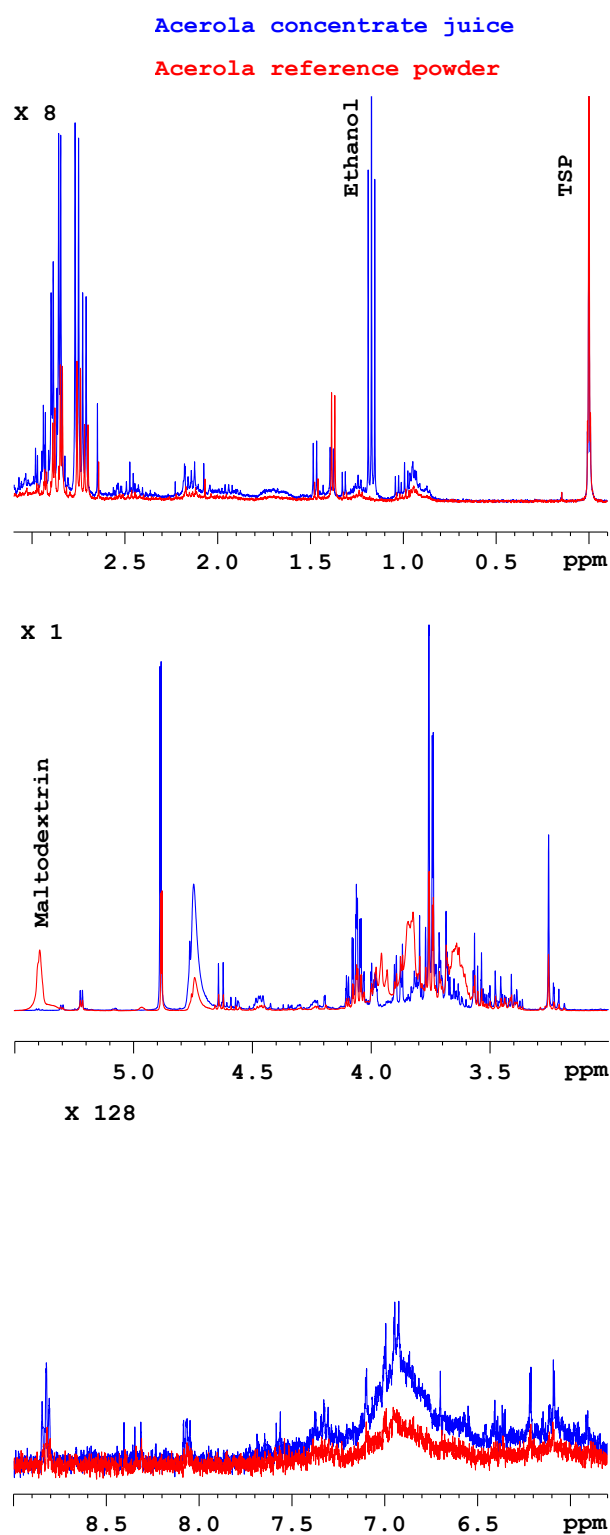

**Figure S1.** Overlay of 1D  $^1\text{H}$ -NMR spectra of acerola concentrate juice (blue) and acerola reference powder (red) (400 MHz, 300 K,  $\text{D}_2\text{O}$ , pH 3.35–20 mM TSP)

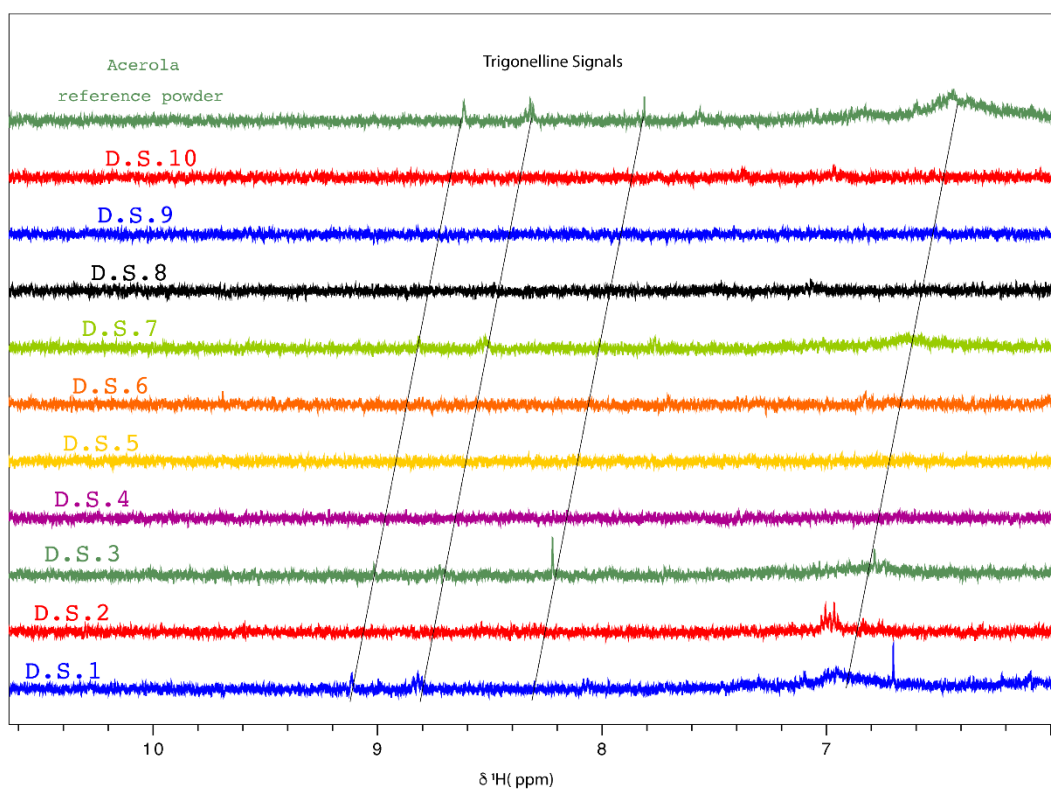

**Figure S2.** Zoom in on signals observed between 6 and 10 ppm (aromatic region) on food supplement  $^1\text{H}$ -NMR spectra (400 MHz, 300 K.  $\text{D}_2\text{O}$ , pH 3.35, 20 mM TSP)

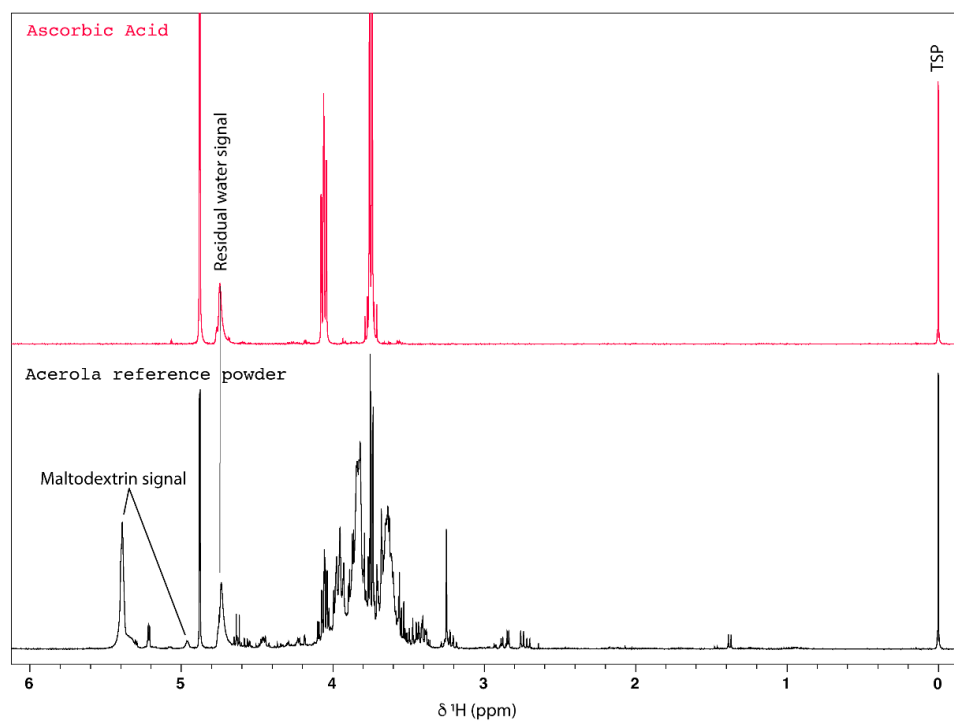

**Figure S3.** Comparison between spectra of ascorbic acid (red) and of the sample of solution prepared from acerola reference powder (black) (400MHz, 300 K, D<sub>2</sub>O pH 3.35, 20 mM TSP)
